# Supplementary material for: Band gap engineering of MnO2 through in situ Al-doping for applicable pseudocapacitors
Source: Royal Society of Chemistry journal article supplement (doi:10.1039/c5ra26830c), 2016-01-01
Supplement: c5ra26830c1.pdf [file c5ra26830c1.pdf]

## Band Gap Engineering of MnO<sub>2</sub> through *In-situ* Al-doping for Applicable Pseudocapacitors

Tianqi Li,<sup>1#</sup> Jiabin Wu,<sup>2#</sup> Xu Xiao,<sup>1</sup> Bingyan Zhang,<sup>1</sup> Zhimi Hu,<sup>1</sup> Jun Zhou,<sup>1</sup> Peihua Yang,<sup>1</sup> Xun Chen,<sup>1</sup> Bo Wang,<sup>1</sup> Liang Huang<sup>1\*</sup>

<sup>1</sup>, Wuhan National Laboratory for Optoelectronics, School of Optical and Electronic Information, Huazhong University of Science and Technology, Wuhan 430074, P. R. China

<sup>2</sup>, School of Materials Science and Engineering, Wuhan University of Technology, Wuhan 430074, P. R. China.

#Authors with equal contribution.

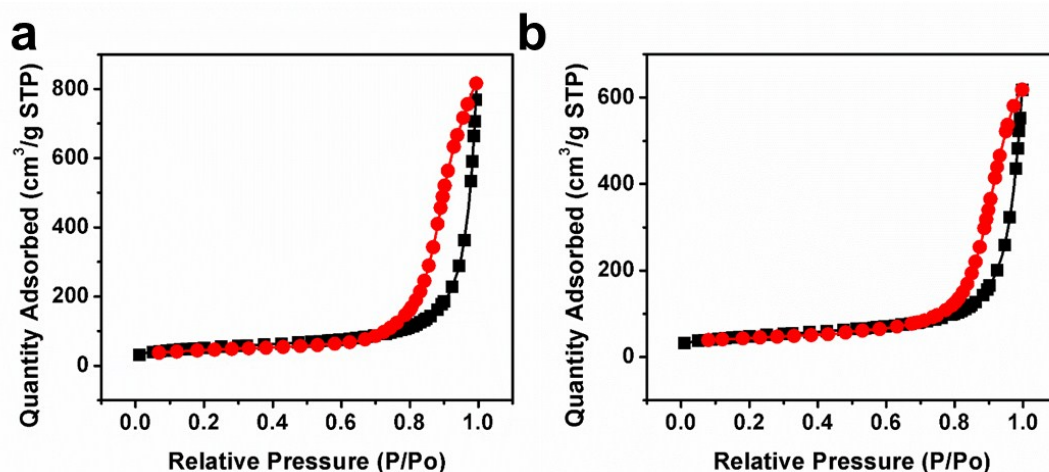

Fig. S1. N<sub>2</sub> adsorption-desorption isotherms of ASM and ADM.

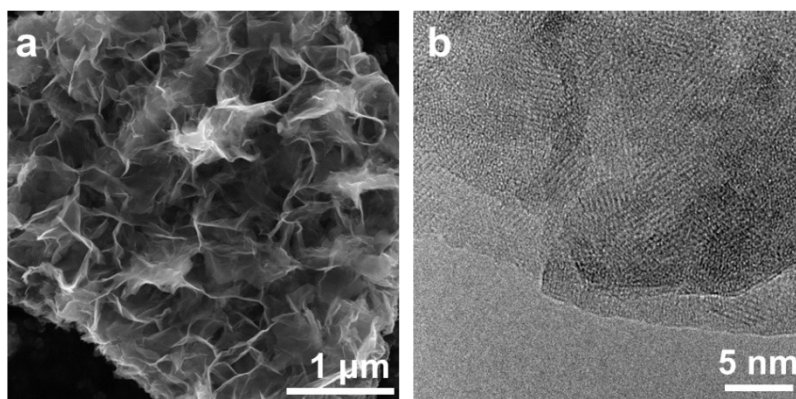

**Fig. S2.** SEM and TEM image of ASM, which shows same morphology of ADM.

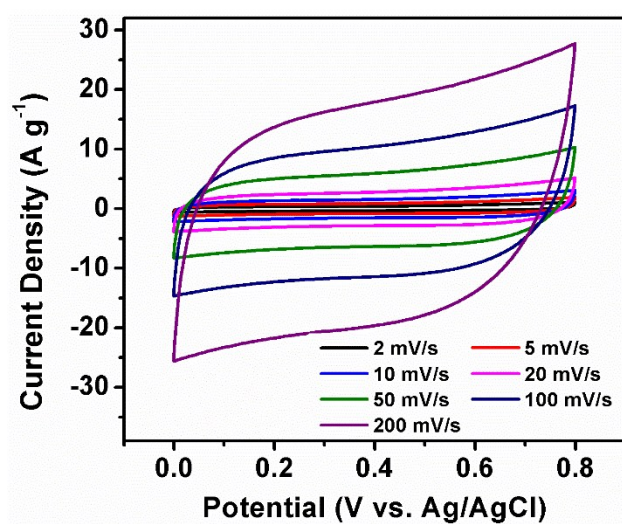

**Fig. S3.** CV curves of ASM from 2 mV s<sup>-1</sup> to 200 mV s<sup>-1</sup>.

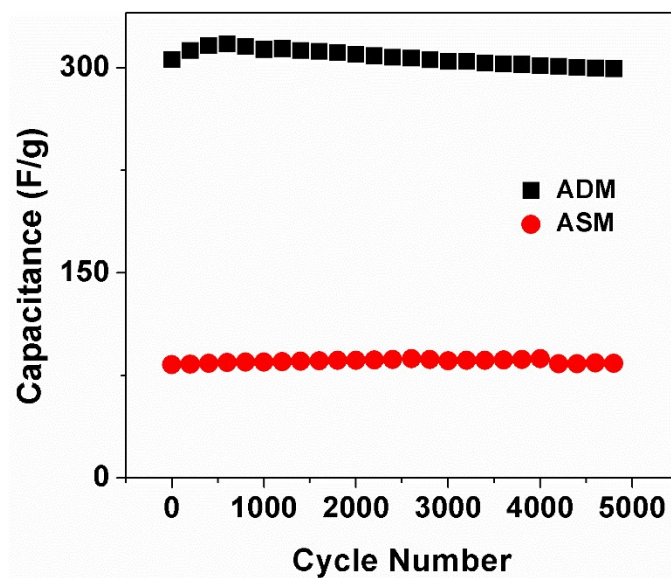

**Fig. S4.** The cycle testing of ADM and ASM through galvanostatic charge/discharge at  $2 \text{ Ag}^{-1}$ .

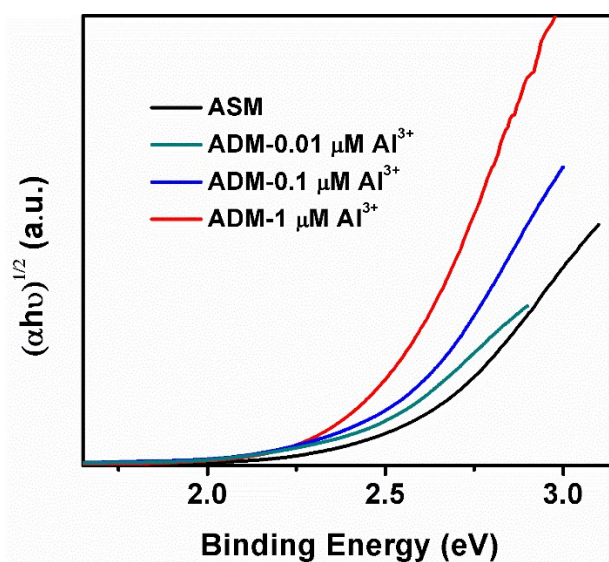

**Fig. S5.** UV-visible  $(\alpha h\nu)^{1/2}$  vs  $E_p$  curves for samples with different  $\text{Al}^{3+}$  concentration.
